# Supplementary material for: Risedronate and Methotrexate Are High-Affinity Inhibitors of New Delhi Metallo-β-Lactamase-1 (NDM-1): A Drug Repurposing Approach
Source: MDPI journal article supplement (doi:10.3390/molecules27041283), 2022-02-14
Supplement: s1 [file s1]

# Risedronate and Methotrexate are High-Affinity Inhibitors of New Delhi Metallo- $\beta$ -Lactamase-1 (NDM-1): A Drug Repurposing Approach

Ghazala Muteeb <sup>1</sup>, Abdulrahman Alsultan <sup>2</sup>, Mohd Farhan <sup>3</sup> and Mohammad Aatif <sup>4,\*</sup>

<sup>1</sup> Department of Nursing, College of Applied Medical Science, King Faisal University, Al-Ahsa 31982, Saudi Arabia; graza@kfu.edu.sa

<sup>2</sup> College of Applied Medical Science, King Faisal University, Al-Ahsa 31982, Saudi Arabia; aalsultan@kfu.edu.sa

<sup>3</sup> Department of Basic Sciences, , King Faisal University, Al-Ahsa 31982, Saudi Arabia; mfarhan@kfu.edu.sa

<sup>4</sup> Department of Public Health, College of Applied Medical Science, King Faisal University, Al-Ahsa 31982, Saudi Arabia

\* Correspondence: maahmad@kfu.edu.sa

**Table S1.** High Throughput Virtual Screening (HTVS) parameters of the FDA-approved drugs.

| S. No. | Name of drugs | Docking score (kcal mol <sup>-1</sup> ) | S. No. | Name of drugs                    | Docking score (kcal mol <sup>-1</sup> ) |
|--------|---------------|-----------------------------------------|--------|----------------------------------|-----------------------------------------|
| 1.     | Foscarnet     | -9.380                                  | 414.   | Sulfadoxine                      | -5.625                                  |
| 2.     | Etidronate    | -8.968                                  | 415.   | (+,-)-Octopamine                 | -5.623                                  |
| 3.     | Ethamsylate   | -8.922                                  | 416.   | L-Arginine                       | -5.623                                  |
| 4.     | Risedronate   | -8.808                                  | 417.   | Trilostane                       | -5.622                                  |
| 5.     | Pamidronate   | -8.763                                  | 418.   | Carbamyl- $\beta$ -methylcholine | -5.616                                  |
| 6.     | Taurine       | -8.638                                  | 419.   | Ornidazole                       | -5.612                                  |
| 7.     | Pasiniazid    | -8.524                                  | 420.   | Ethinyl estradiol                | -5.607                                  |
| 8.     | Ticarcillin   | -8.442                                  | 421.   | Menadione                        | -5.606                                  |
| 9.     | Fosbretabulin | -8.414                                  | 422.   | Levodropropizine                 | -5.603                                  |
| 10.    | Carboplatin   | -8.353                                  | 423.   | Flubendazole                     | -5.597                                  |
| 11.    | Acipimox      | -8.276                                  | 424.   | Spectinomycin                    | -5.594                                  |
| 12.    | Tenofovir     | -8.245                                  | 425.   | Prucalopride                     | -5.580                                  |
| 13.    | Fludarabine   | -8.231                                  | 426.   | Moguisteine                      | -5.576                                  |
| 14.    | Nateglinide   | -8.230                                  | 427.   | Dasatinib                        | -5.560                                  |
| 15.    | Rebamipide    | -8.226                                  | 428.   | Galardin/Ilomastat               | -5.552                                  |
| 16.    | Tasisulam     | -8.222                                  | 429.   | Felodipine                       | -5.551                                  |
| 17.    | Pranoprofen   | -8.191                                  | 430.   | Milrinone                        | -5.538                                  |
| 18.    | Alendronate   | -8.181                                  | 431.   | Secnidazole                      | -5.538                                  |
| 19.    | Azlocillin    | -8.105                                  | 432.   | Capecitabine                     | -5.528                                  |
| 20.    | Orotic acid   | -8.083                                  | 433.   | Donepezil                        | -5.517                                  |
| 21.    | Methotrexate  | -8.065                                  | 434.   | Riluzole                         | -5.517                                  |
| 22.    | Mesna         | -7.988                                  | 435.   | Nilvadipine                      | -5.508                                  |
| 23.    | Olsalazine    | -7.968                                  | 436.   | Rimonabant                       | -5.495                                  |
| 24.    | Sulbactam     | -7.962                                  | 437.   | Tetramisole                      | -5.495                                  |

|     |                       |        |      |                       |        |
|-----|-----------------------|--------|------|-----------------------|--------|
| 25. | Aspirin               | -7.924 | 438. | Propylthiouracil      | -5.494 |
| 26. | Nalidixic acid        | -7.921 | 439. | Solifenacin succinate | -5.494 |
| 27. | Pircetam              | -7.917 | 440. | Nitrendipine          | -5.493 |
| 28. | Ibandronate           | -7.902 | 441. | Chlorpropamide        | -5.491 |
| 29. | Biotin                | -7.866 | 442. | Avanafil              | -5.459 |
| 30. | Carprofen             | -7.851 | 443. | Trichlormethiazide    | -5.459 |
| 31. | Sodium butyrate       | -7.839 | 444. | Sulfadiazine          | -5.459 |
| 32. | Benzoic acid          | -7.828 | 445. | Mycophenolate mofetil | -5.458 |
| 33. | Sodium ascorbate      | -7.775 | 446. | Thiabendazole         | -5.457 |
| 34. | Ketoprofen            | -7.767 | 447. | Ampiroxicam           | -5.449 |
| 35. | Cinchophen            | -7.748 | 448. | Tazarotene            | -5.448 |
| 36. | Inosine               | -7.746 | 449. | Raltegravir           | -5.448 |
| 37. | Tranexamic acid       | -7.725 | 450. | Benazepril            | -5.447 |
| 38. | Raltitrexed           | -7.716 | 451. | Zidovudine            | -5.445 |
| 39. | Epalrestat            | -7.708 | 452. | Terfenadine           | -5.444 |
| 40. | Niacin                | -7.704 | 453. | Etomidate             | -5.441 |
| 41. | Phthalylsulfacetamide | -7.656 | 454. | Levamisole            | -5.441 |
| 42. | Meropenem             | -7.640 | 455. | Progesterone          | -5.440 |
| 43. | Cinoxacin             | -7.629 | 456. | Sulfaguanidine        | -5.430 |
| 44. | Flumequine            | -7.629 | 457. | Acyclovir             | -5.427 |
| 45. | Tolcapone             | -7.622 | 458. | Linagliptin           | -5.409 |
| 46. | Carbenicillin         | -7.611 | 459. | Minocycline           | -5.405 |
| 47. | Procodazole           | -7.611 | 460. | S-Ruxolitinib         | -5.403 |
| 48. | Ciprofibrate          | -7.604 | 461. | Amisulpride           | -5.401 |
| 49. | Zileuton              | -7.603 | 462. | Climbazole            | -5.400 |
| 50. | Sodium picosulfate    | -7.601 | 463. | Carvedilol            | -5.392 |
| 51. | Zaltoprofen           | -7.574 | 464. | Azelastine            | -5.390 |
| 52. | Flufenamic acid       | -7.568 | 465. | Topiramate            | -5.388 |
| 53. | Methyl dopa           | -7.544 | 466. | Nabumetone            | -5.377 |
| 54. | Aicar                 | -7.539 | 467. | Amfebutamone          | -5.374 |
| 55. | Flucytosine           | -7.539 | 468. | Amonafide             | -5.373 |
| 56. | Pidotimod             | -7.526 | 469. | Pemirolast            | -5.373 |
| 57. | Zalcitabine           | -7.525 | 470. | Fluocinonide          | -5.370 |
| 58. | Ibuprofen             | -7.514 | 471. | Camostat mesilate     | -5.361 |
| 59. | Entecavir             | -7.499 | 472. | Bifonazole            | -5.351 |
| 60. | Chromocarb            | -7.496 | 473. | Roxatidine            | -5.344 |
| 61. | Sodium gluconate      | -7.491 | 474. | Tebipenem pivoxil     | -5.344 |
| 62. | Mizoribine            | -7.481 | 475. | Naloxone              | -5.337 |
| 63. | Triflusal             | -7.480 | 476. | Valaciclovir          | -5.332 |
| 64. | Enalaprilat           | -7.471 | 477. | Icotinib              | -5.321 |
| 65. | Oxiracetam            | -7.448 | 478. | Palonosetron          | -5.320 |
| 66. | Cytarabine            | -7.438 | 479. | Prednisolone          | -5.313 |
| 67. | Lonidamine            | -7.404 | 480. | Levosulpiride         | -5.311 |
| 68. | Cidofovir             | -7.397 | 481. | Troxipide             | -5.311 |
| 69. | Clofibric acid        | -7.391 | 482. | Yohimbine             | -5.311 |
| 70. | Diclazuril            | -7.386 | 483. | Vinpocetine           | -5.309 |

|      |                       |        |      |                       |        |
|------|-----------------------|--------|------|-----------------------|--------|
| 71.  | Enoxacin              | -7.372 | 484. | Histamine             | -5.308 |
| 72.  | Oxaprozin             | -7.370 | 485. | Desonide              | -5.305 |
| 73.  | Sodium phenylbutyrate | -7.367 | 486. | Hexestrol             | -5.300 |
| 74.  | Etodolac              | -7.355 | 487. | Nalmefene             | -5.300 |
| 75.  | Oxfendazole           | -7.354 | 488. | Phenytoin             | -5.296 |
| 76.  | Chloroxine            | -7.349 | 489. | Ractopamine           | -5.296 |
| 77.  | Clinofibrate          | -7.345 | 490. | Topotecan             | -5.294 |
| 78.  | Furosemide            | -7.341 | 491. | Methazolamide         | -5.285 |
| 79.  | Ribavirin             | -7.335 | 492. | Loratadine            | -5.284 |
| 80.  | Noradrenaline         | -7.328 | 493. | Desvenlafaxine        | -5.276 |
| 81.  | Piromidic acid        | -7.324 | 494. | Apixaban              | -5.275 |
| 82.  | Isosorbide            | -7.322 | 495. | Butylscopolamine      | -5.269 |
| 83.  | Ciclopirox            | -7.311 | 496. | Diperodon             | -5.264 |
| 84.  | Adenosine             | -7.291 | 497. | Nifedipine            | -5.261 |
| 85.  | Dopamine              | -7.267 | 498. | Imiquimod             | -5.257 |
| 86.  | Naproxen              | -7.266 | 499. | Lubiprostone          | -5.256 |
| 87.  | Suprofen              | -7.263 | 500. | Buflomedil            | -5.244 |
| 88.  | Dyphylline            | -7.261 | 501. | Candesartan           | -5.244 |
| 89.  | Streptozocin          | -7.261 | 502. | Rufinamide            | -5.244 |
| 90.  | Olopatadine           | -7.246 | 503. | Epinastine            | -5.243 |
| 91.  | Dihydroartemisinin    | -7.245 | 504. | Prasugrel             | -5.235 |
| 92.  | Fluvastatin           | -7.234 | 505. | Estradiol cypionate   | -5.229 |
| 93.  | Gimeracil             | -7.234 | 506. | Moxifloxacin          | -5.222 |
| 94.  | Omeprazole            | -7.224 | 507. | Metaraminol           | -5.202 |
| 95.  | DL-Carnitine          | -7.223 | 508. | Meticrane             | -5.198 |
| 96.  | Tolfenamic            | -7.195 | 509. | Azaperone             | -5.193 |
| 97.  | Niflumic acid         | -7.193 | 510. | Levonorgestrel        | -5.192 |
| 98.  | Enrofloxacin          | -7.172 | 511. | Fudosteine            | -5.184 |
| 99.  | Uridine               | -7.172 | 512. | Mestranol             | -5.182 |
| 100. | Felbamate             | -7.167 | 513. | Gestodene             | -5.180 |
| 101. | Nitrofurazone         | -7.163 | 514. | Phentolamine mesilate | -5.179 |
| 102. | Mefenamic acid        | -7.163 | 515. | Voriconazole          | -5.167 |
| 103. | (R)-Baclofen          | -7.158 | 516. | Indapamide            | -5.166 |
| 104. | Diclofenac            | -7.153 | 517. | Pilocarpine           | -5.156 |
| 105. | Tranilast             | -7.152 | 518. | Diethylstilbestrol    | -5.148 |
| 106. | Isoniazid             | -7.151 | 519. | Tinidazole            | -5.147 |
| 107. | Pefloxacin mesylate   | -7.133 | 520. | Varenicline           | -5.133 |
| 108. | Febuxostat            | -7.132 | 521. | Acebutolol            | -5.131 |
| 109. | Chlorothiazide        | -7.131 | 522. | Flavoxate             | -5.124 |
| 110. | Dimesna               | -7.131 | 523. | Nicotine              | -5.124 |
| 111. | Doxifluridine         | -7.115 | 524. | Nialamide             | -5.111 |
| 112. | Sarafloxacin          | -7.109 | 525. | Dimethyl              | -5.110 |
| 113. | Glaferine             | -7.105 | 526. | Ketotifen             | -5.103 |
| 114. | Valganciclovir        | -7.104 | 527. | Naltrexone            | -5.100 |
| 115. | Bindarit              | -7.103 | 528. | Fenofibrate           | -5.084 |
| 116. | Lisinopril            | -7.103 | 529. | Trimethoprim          | -5.076 |

|      |                      |        |      |                     |        |
|------|----------------------|--------|------|---------------------|--------|
| 117. | Bezafibrate          | -7.078 | 530. | Deoxycorticosterone | -5.074 |
| 118. | Indomethacin         | -7.076 | 531. | Monobenzene         | -5.062 |
| 119. | Sulindac             | -7.069 | 532. | Spironolactone      | -5.061 |
| 120. | Erdosteine           | -7.065 | 533. | Acetanilide         | -5.041 |
| 121. | Flopropione          | -7.056 | 534. | Detomidine          | -5.017 |
| 122. | L-Carnitine          | -7.036 | 535. | Carbazochrome       | -5.014 |
| 123. | Flunixin meglumine   | -7.028 | 536. | Tioconazole         | -5.013 |
| 124. | Captopril            | -7.023 | 537. | Phenytoin           | -5.009 |
| 125. | Tolmetin             | -7.014 | 538. | Nimesulide          | -5.007 |
| 126. | Chlorquinaldol       | -6.998 | 539. | Paroxetine          | -5.004 |
| 127. | Isoetharine mesylate | -6.986 | 540. | Aripiprazole        | -4.993 |
| 128. | Probenecid           | -6.979 | 541. | Haloperidol         | -4.978 |
| 129. | Levofloxacin         | -6.973 | 542. | Quinapril           | -4.961 |
| 130. | Linezolid            | -6.964 | 543. | Glipizide           | -4.958 |
| 131. | Temozolomide         | -6.957 | 544. | Escitalopram        | -4.953 |
| 132. | Adrenalone           | -6.952 | 545. | Urapidil            | -4.952 |
| 133. | Genistein            | -6.950 | 546. | Dienogest           | -4.947 |
| 134. | Nadifloxacin         | -6.950 | 547. | Oxybutynin          | -4.947 |
| 135. | Canrenoic acid       | -6.946 | 548. | Luliconazole        | -4.944 |
| 136. | Norfloxacin          | -6.946 | 549. | Busulfan            | -4.940 |
| 137. | Acitretin            | -6.934 | 550. | Tropisetron         | -4.934 |
| 138. | Famotidine           | -6.929 | 551. | Deflazacort         | -4.926 |
| 139. | Lomefloxacin         | -6.929 | 552. | Cleviprex           | -4.917 |
| 140. | Balofloxacin         | -6.928 | 553. | Enoxolone           | -4.916 |
| 141. | Fluorouracil         | -6.920 | 554. | Pyridostigmine      | -4.912 |
| 142. | Mozavaptan           | -6.919 | 555. | Sorafenib           | -4.903 |
| 143. | Uracil               | -6.915 | 556. | Venlafaxine         | -4.898 |
| 144. | Nicotinamide         | -6.913 | 557. | Pimozide            | -4.884 |
| 145. | (S)-(+)-Flurbiprofen | -6.911 | 558. | Metolazone          | -4.874 |
| 146. | Isoprenaline         | -6.902 | 559. | Nisoldipine         | -4.869 |
| 147. | Gabapentin           | -6.891 | 560. | Berberine           | -4.866 |
| 148. | Ellagic acid         | -6.877 | 561. | Benzthiazide        | -4.863 |
| 149. | Epinephrine          | -6.872 | 562. | Econazole           | -4.861 |
| 150. | L-Adrenaline         | -6.872 | 563. | Altrenogest         | -4.857 |
| 151. | Carbamazepine        | -6.866 | 564. | Acetylcysteine      | -4.855 |
| 152. | Glutamine            | -6.866 | 565. | Pelitinib           | -4.816 |
| 153. | Tamibarotene         | -6.866 | 566. | Cyproterone         | -4.802 |
| 154. | Levetiracetam        | -6.863 | 567. | Ondansetron         | -4.800 |
| 155. | Cyclandelate         | -6.857 | 568. | Rizatriptan         | -4.796 |
| 156. | Allopurinol          | -6.847 | 569. | Iloperidone         | -4.795 |
| 157. | Ursodiol             | -6.844 | 570. | Procarbazine        | -4.791 |
| 158. | Zoxazolamine         | -6.843 | 571. | Doxercalciferol     | -4.790 |
| 159. | Perindopril erbumine | -6.837 | 572. | Mevastatin          | -4.780 |
| 160. | Isoxicam             | -6.837 | 573. | Betaxolol           | -4.762 |
| 161. | Emtricitabine        | -6.829 | 574. | Medroxyprogesterone | -4.759 |
| 162. | Hydrocortisone       | -6.827 | 575. | Clofocetol          | -4.742 |

|      |                   |        |      |                         |        |
|------|-------------------|--------|------|-------------------------|--------|
| 163. | Nelarabine        | -6.823 | 576. | Anastrozole             | -4.741 |
| 164. | Thalidomide       | -6.820 | 577. | Sulfamethoxypyridazine  | -4.732 |
| 165. | Bexarotene        | -6.816 | 578. | Trometamol              | -4.729 |
| 166. | Flupirtine        | -6.816 | 579. | Rivastigmine            | -4.720 |
| 167. | Cladribine        | -6.800 | 580. | Agomelatine             | -4.718 |
| 168. | Prednisone        | -6.788 | 581. | Drospirenone            | -4.718 |
| 169. | Phenindione       | -6.780 | 582. | Famciclovir             | -4.711 |
| 170. | Ciclesonide       | -6.775 | 583. | Vilazodone              | -4.706 |
| 171. | Deferasirox       | -6.747 | 584. | Sulfanilamide           | -4.701 |
| 172. | Droperidol        | -6.744 | 585. | Idebenone               | -4.699 |
| 173. | Dexrazoxane       | -6.733 | 586. | Fosfomycin tromethamine | -4.697 |
| 174. | Sparfloxacin      | -6.724 | 587. | Simvastatin             | -4.697 |
| 175. | Aniracetam        | -6.700 | 588. | Batimastat              | -4.694 |
| 176. | Anagrelide        | -6.697 | 589. | Glyburide               | -4.694 |
| 177. | Carbadox          | -6.693 | 590. | Ranolazine              | -4.693 |
| 178. | Gemcitabine       | -6.691 | 591. | Alogliptin              | -4.686 |
| 179. | Miglitol          | -6.690 | 592. | Mirtazapine             | -4.683 |
| 180. | Mecarbinat        | -6.686 | 593. | Trimebutine             | -4.678 |
| 181. | Floxuridine       | -6.681 | 594. | Mianserin               | -4.673 |
| 182. | Aminoglutethimide | -6.679 | 595. | Thiamine                | -4.673 |
| 183. | Dexamethasone     | -6.671 | 596. | Butoconazole            | -4.658 |
| 184. | Diacerein         | -6.664 | 597. | Benzbromarone           | -4.657 |
| 185. | Mepiroxol         | -6.663 | 598. | Nimodipine              | -4.652 |
| 186. | Domperidone       | -6.661 | 599. | Naftopidil              | -4.643 |
| 187. | Besifloxacin      | -6.648 | 600. | Brimonidine tartrate    | -4.64  |
| 188. | Voglibose         | -6.623 | 601. | Alibendol               | -4.639 |
| 189. | Phenylbutazone    | -6.614 | 602. | Rimantadine             | -4.636 |
| 190. | Triamcinolone     | -6.613 | 603. | Methyclothiazide        | -4.622 |
| 191. | Lamivudine        | -6.608 | 604. | Sulfamethazine          | -4.619 |
| 192. | Nifenazone        | -6.600 | 605. | Gabexate mesylate       | -4.612 |
| 193. | Gatifloxacin      | -6.584 | 606. | Dexmedetomidine         | -4.610 |
| 194. | Adenine           | -6.577 | 607. | Halobetasol propionate  | -4.609 |
| 195. | Idoxuridine       | -6.576 | 608. | Oxybutynin              | -4.601 |
| 196. | Deferiprone       | -6.574 | 609. | Tizanidine              | -4.601 |
| 197. | Dextrose          | -6.571 | 610. | Pranlukast              | -4.600 |
| 198. | Tetracycline      | -6.565 | 611. | Prazosin                | -4.588 |
| 199. | Aminophylline     | -6.547 | 612. | Fluconazole             | -4.583 |
| 200. | Meprednisone      | -6.547 | 613. | Varlitinib              | -4.577 |
| 201. | Chlorzoxazone     | -6.534 | 614. | Semagacestat            | -4.575 |
| 202. | Lithocholic acid  | -6.523 | 615. | Ethionamide             | -4.567 |
| 203. | Dacarbazine       | -6.510 | 616. | Halcinonide             | -4.551 |
| 204. | Etravirine        | -6.498 | 617. | Esmolol                 | -4.546 |
| 205. | Penciclovir       | -6.495 | 618. | Dorzolamide             | -4.544 |
| 206. | Betamipron        | -6.494 | 619. | Melatonin               | -4.527 |
| 207. | Tioxolone         | -6.492 | 620. | Irbesartan              | -4.524 |
| 208. | Bromfenac         | -6.488 | 621. | Naratriptan             | -4.522 |

|      |                       |        |      |                     |        |
|------|-----------------------|--------|------|---------------------|--------|
| 209. | Furaltadone           | -6.484 | 622. | Medetomidine        | -4.520 |
| 210. | Cephalexin            | -6.483 | 623. | Ritodrine           | -4.497 |
| 211. | Sulfacetamide         | -6.483 | 624. | Doxapram            | -4.495 |
| 212. | Marbofloxacin         | -6.469 | 625. | Aspartame           | -4.480 |
| 213. | Veliparib             | -6.465 | 626. | Olanzapine          | -4.476 |
| 214. | Aztreonam             | -6.460 | 627. | Trazodone           | -4.469 |
| 215. | Bemegride             | -6.458 | 628. | Vitamin A           | -4.468 |
| 216. | Hyoscyamine           | -6.455 | 629. | Estradiol valerate  | -4.439 |
| 217. | Piperine              | -6.446 | 630. | Choline             | -4.438 |
| 218. | Teriflunomide         | -6.444 | 631. | Eprazinone          | -4.419 |
| 219. | D-Phenylalanine       | -6.441 | 632. | Nepafenac           | -4.415 |
| 220. | Aminothiazole         | -6.435 | 633. | Clonidine           | -4.413 |
| 221. | Mirabegron            | -6.433 | 634. | Benzocaine          | -4.409 |
| 222. | Xylose                | -6.432 | 635. | Istradefylline      | -4.407 |
| 223. | Artesunate            | -6.430 | 636. | Eletriptan          | -4.396 |
| 224. | Ganetespib            | -6.430 | 637. | Ezetimibe           | -4.394 |
| 225. | Albendazole           | -6.428 | 638. | Prilocaine          | -4.377 |
| 226. | Pirfenidone           | -6.426 | 639. | Methimazole         | -4.374 |
| 227. | Pyrazinamide          | -6.426 | 640. | Oxybuprocaine       | -4.347 |
| 228. | Adapalene             | -6.422 | 641. | Valsartan           | -4.328 |
| 229. | Carmofur              | -6.422 | 642. | Nifuroxazide        | -4.310 |
| 230. | Meloxicam             | -6.421 | 643. | Rasagiline mesylate | -4.309 |
| 231. | Ronidazole            | -6.417 | 644. | Verapamil           | -4.306 |
| 232. | Tenoxicam             | -6.416 | 645. | Phenacetin          | -4.294 |
| 233. | Ipriflavone           | -6.409 | 646. | Artemether          | -4.293 |
| 234. | Tiopronin             | -6.403 | 647. | Terazosin           | -4.292 |
| 235. | Florfenicol           | -6.401 | 648. | Trelagliptin        | -4.289 |
| 236. | Mercaptopurine        | -6.400 | 649. | Dofetilide          | -4.285 |
| 237. | Bendamustine          | -6.396 | 650. | Ebastine            | -4.277 |
| 238. | Galanthamine          | -6.392 | 651. | Clozapine           | -4.271 |
| 239. | Acemetacin            | -6.388 | 652. | Oxcarbazepine       | -4.259 |
| 240. | Lomustine             | -6.386 | 653. | Miconazole          | -4.252 |
| 241. | Azathioprine          | -6.384 | 654. | Sulconazole         | -4.217 |
| 242. | Irsogladine           | -6.384 | 655. | Ziprasidone         | -4.192 |
| 243. | Dinitolmide           | -6.383 | 656. | Quinine             | -4.184 |
| 244. | Salbutamol            | -6.381 | 657. | Camylofine          | -4.178 |
| 245. | Divalproex            | -6.379 | 658. | Oxaliplatin         | -4.172 |
| 246. | Lafutidine            | -6.371 | 659. | Betahistine         | -4.112 |
| 247. | Serotonin             | -6.371 | 660. | Cilnidipine         | -4.109 |
| 248. | Danofloxacin mesylate | -6.370 | 661. | Mexiletine          | -4.105 |
| 249. | Altretamine           | -6.363 | 662. | Memantine           | -4.102 |
| 250. | Gemfibrozil           | -6.361 | 663. | Silodosin           | -4.101 |
| 251. | Misoprostol           | -6.360 | 664. | Bupivacaine         | -4.100 |
| 252. | Canagliflozin         | -6.353 | 665. | Ramelteon           | -4.099 |
| 253. | Ozagrel               | -6.342 | 666. | Diltiazem           | -4.031 |
| 254. | Trifluridine          | -6.331 | 667. | Fluorometholone     | -4.026 |

|      |                       |        |      |                  |        |
|------|-----------------------|--------|------|------------------|--------|
| 255. | Pentoxifylline        | -6.329 | 668. | Cysteamine       | -4.011 |
| 256. | Vildagliptin          | -6.329 | 669. | Moxonidine       | -4.008 |
| 257. | Methacycline          | -6.323 | 670. | Miconazole       | -3.999 |
| 258. | Broxyquinoline        | -6.321 | 671. | Apatinib         | -3.998 |
| 259. | Amiloride             | -6.317 | 672. | Roflumilast      | -3.997 |
| 260. | Cephapirin            | -6.317 | 673. | Lacidipine       | -3.992 |
| 261. | Phenazopyridine       | -6.313 | 674. | Tetrahydrozoline | -3.976 |
| 262. | Phenylephrine         | -6.305 | 675. | Hydroxyzine      | -3.970 |
| 263. | Baricitinib           | -6.299 | 676. | Amorolfine       | -3.968 |
| 264. | Azacitidine           | -6.297 | 677. | Celecoxib        | -3.967 |
| 265. | Triamterene           | -6.296 | 678. | Ambroxol         | -3.961 |
| 266. | Ftorafur              | -6.296 | 679. | Nefopam          | -3.958 |
| 267. | Chenodiol             | -6.295 | 680. | Azacyclonol      | -3.936 |
| 268. | 5-Aminolevulinic acid | -6.281 | 681. | Protionamide     | -3.906 |
| 269. | Antipyrine            | -6.279 | 682. | Cinacalcet       | -3.897 |
| 270. | Benzylpenicillin      | -6.269 | 683. | Alfacalcidol     | -3.891 |
| 271. | Lornoxicam            | -6.267 | 684. | Isoconazole      | -3.885 |
| 272. | Piroxicam             | -6.266 | 685. | Eplerenone       | -3.878 |
| 273. | Finasteride           | -6.262 | 686. | Tripelennamine   | -3.870 |
| 274. | Guaifenesin           | -6.259 | 687. | Letrozole        | -3.868 |
| 275. | Zanamivir             | -6.255 | 688. | Ropivacaine      | -3.859 |
| 276. | Thioguanine           | -6.251 | 689. | Timolol maleate  | -3.853 |
| 277. | Aceclidine            | -6.242 | 690. | Mechlorethamine  | -3.847 |
| 278. | Nefiracetam           | -6.240 | 691. | Alizapride       | -3.843 |
| 279. | Flumazenil            | -6.237 | 692. | Tolbutamide      | -3.841 |
| 280. | Amoxicillin           | -6.232 | 693. | Clomipramine     | -3.837 |
| 281. | Gliclazide            | -6.226 | 694. | Lidocaine        | -3.817 |
| 282. | Imatinib              | -6.226 | 695. | Almotriptan      | -3.812 |
| 283. | Methylthiouracil      | -6.225 | 696. | Loxapine         | -3.807 |
| 284. | Atovaquone            | -6.212 | 697. | Tacrine          | -3.805 |
| 285. | Tianeptine            | -6.212 | 698. | Moclobemide      | -3.791 |
| 286. | Difluoxacin           | -6.209 | 699. | Asenapine        | -3.790 |
| 287. | Oxytetracycline       | -6.205 | 700. | Bufexamac        | -3.778 |
| 288. | Praziquantel          | -6.204 | 701. | Bisoprolol       | -3.762 |
| 289. | Methoxsalen           | -6.199 | 702. | Aminacrine       | -3.743 |
| 290. | Telbivudine           | -6.195 | 703. | Sulfamethizole   | -3.723 |
| 291. | Pioglitazone          | -6.187 | 704. | Sulfamethoxazole | -3.722 |
| 292. | Cetirizine            | -6.186 | 705. | Fluoxetine       | -3.702 |
| 293. | Ipratropium           | -6.185 | 706. | Procaine         | -3.696 |
| 294. | Clofarabine           | -6.184 | 707. | Leflunomide      | -3.691 |
| 295. | Bumetanide            | -6.183 | 708. | Pramipexole.     | -3.685 |
| 296. | Tropicamide           | -6.181 | 709. | Sulfisoxazole    | -3.678 |
| 297. | Alfuzosin             | -6.180 | 710. | Metformin        | -3.665 |
| 298. | Penicillamine         | -6.176 | 711. | Primaquine       | -3.665 |
| 299. | Ifosfamide            | -6.175 | 712. | Tobramycin       | -3.665 |
| 300. | Cyromazine            | -6.174 | 713. | Ethacridine      | -3.658 |

|      |                   |        |      |                  |        |
|------|-------------------|--------|------|------------------|--------|
| 301. | Tolvaptan         | -6.173 | 714. | Clorsulon        | -3.632 |
| 302. | Nevirapine        | -6.172 | 715. | Mepivacaine      | -3.622 |
| 303. | Estriol           | -6.162 | 716. | Cilostazol       | -3.619 |
| 304. | Coumarin          | -6.160 | 717. | Procyclidine     | -3.599 |
| 305. | Mycophenolic acid | -6.159 | 718. | Amlodipine       | -3.576 |
| 306. | Lincomycin        | -6.155 | 719. | Thioridazine     | -3.565 |
| 307. | Sulfameter        | -6.154 | 720. | Levosimendan     | -3.547 |
| 308. | Dinoprostone      | -6.153 | 721. | Phenoxybenzamine | -3.545 |
| 309. | Lansoprazole      | -6.145 | 722. | Cefdinir         | -3.511 |
| 310. | Sulphadimethoxine | -6.142 | 723. | Mubritinib       | -3.510 |
| 311. | Homatropine       | -6.139 | 724. | Phenformin       | -3.505 |
| 312. | Homatropine       | -6.132 | 725. | Reboxetine       | -3.457 |
| 313. | Bisacodyl         | -6.117 | 726. | Flunarizine      | -3.453 |
| 314. | Pregnenolone      | -6.112 | 727. | Dapoxetine       | -3.452 |
| 315. | Ganciclovir       | -6.110 | 728. | Ambrisentan      | -3.435 |
| 316. | Sulfapyridine     | -6.095 | 729. | Naphazoline      | -3.426 |
| 317. | Empagliflozin     | -6.092 | 730. | Cimetidine       | -3.410 |
| 318. | Thiamphenicol     | -6.090 | 731. | Repaglinide      | -3.406 |
| 319. | Pyridoxine        | -6.089 | 732. | Orlistat         | -3.396 |
| 320. | Chlormezanone     | -6.088 | 733. | Levobetaxolol    | -3.390 |
| 321. | Pravastatin       | -6.085 | 734. | Vortioxetine     | -3.359 |
| 322. | Mequinol          | -6.081 | 735. | Trimipramine     | -3.327 |
| 323. | Bicalutamide      | -6.075 | 736. | Pizotifen        | -3.313 |
| 324. | Dichlorphenamide  | -6.074 | 737. | Rilpivirine      | -3.300 |
| 325. | Pazopanib         | -6.066 | 738. | Mifepristone     | -3.292 |
| 326. | Etofibrate        | -6.057 | 739. | Sulfathiazole    | -3.292 |
| 327. | Resveratrol       | -6.048 | 740. | Atomoxetine      | -3.286 |
| 328. | Anisindione       | -6.042 | 741. | Cyproheptadine   | -3.273 |
| 329. | Meptazinol        | -6.041 | 742. | Chlorpheniramine | -3.226 |
| 330. | Pramiracetam      | -6.037 | 743. | Dibucaine        | -3.224 |
| 331. | Silibinin         | -6.037 | 744. | Imipramine       | -3.211 |
| 332. | Carbidopa         | -6.024 | 745. | Clopidogrel      | -3.208 |
| 333. | Methocarbamol     | -6.021 | 746. | Disopyramide     | -3.194 |
| 334. | Carbimazole       | -6.009 | 747. | Phenothiazine    | -3.194 |
| 335. | Bentiromide       | -5.997 | 748. | Guanethidine     | -3.175 |
| 336. | Enalapril         | -5.997 | 749. | Vitamin D2       | -3.163 |
| 337. | Racecadotril      | -5.996 | 750. | Tolazoline       | -3.152 |
| 338. | Cloxacillin       | -5.991 | 751. | Dyclonine        | -3.137 |
| 339. | Torsemide         | -5.991 | 752. | Isradipine       | -3.128 |
| 340. | Cytisine          | -5.986 | 753. | Desloratadine    | -3.126 |
| 341. | Chlorocresol      | -5.983 | 754. | Brompheniramine  | -3.098 |
| 342. | Hydralazine       | -5.983 | 755. | Flutamide        | -3.097 |
| 343. | Ampicillin        | -5.977 | 756. | Trospium         | -3.069 |
| 344. | Nafcillin         | -5.966 | 757. | Tolperisone      | -3.063 |
| 345. | Benserazide       | -5.965 | 758. | Adiphenine       | -3.049 |
| 346. | Azilsartan        | -5.960 | 759. | Risperidone      | -3.030 |



|      |                  |        |      |                          |        |
|------|------------------|--------|------|--------------------------|--------|
| 347. | Formestane       | -5.958 | 760. | Cyclizine                | -3.018 |
| 348. | Glimepiride      | -5.950 | 761. | Oxacillin                | -3.013 |
| 349. | Edaravone        | -5.947 | 762. | Chlorpromazine           | -3.005 |
| 350. | Vidarabine       | -5.946 | 763. | Articaine                | -2.999 |
| 351. | Ampicillin       | -5.924 | 764. | Fluvoxamine              | -2.996 |
| 352. | Tideglusib       | -5.921 | 765. | Orphenadrine             | -2.990 |
| 353. | Rolipram         | -5.917 | 766. | Xylometazoline           | -2.960 |
| 354. | Laquinimod       | -5.915 | 767. | Butenafine               | -2.952 |
| 355. | Zolmitriptan     | -5.915 | 768. | Sertraline               | -2.922 |
| 356. | Avobenzone       | -5.910 | 769. | Methenamine              | -2.911 |
| 357. | Norethindrone    | -5.909 | 770. | Benzethonium             | -2.898 |
| 358. | Doxofylline      | -5.905 | 771. | Guanabenz                | -2.883 |
| 359. | Brinzolamide     | -5.902 | 772. | Maprotiline              | -2.879 |
| 360. | Cyclophosphamide | -5.902 | 773. | Ticlopidine              | -2.878 |
| 361. | Exemestane       | -5.901 | 774. | Doxylamine               | -2.876 |
| 362. | Dropropizine     | -5.900 | 775. | Thiotepa                 | -2.851 |
| 363. | Dexlansoprazole  | -5.897 | 776. | Mitotane                 | -2.846 |
| 364. | Zonisamide       | -5.897 | 777. | Clotrimazole             | -2.828 |
| 365. | Estrone          | -5.887 | 778. | Prednisolone             | -2.826 |
| 366. | D-Mannitol       | -5.886 | 779. | Diphenhydramine          | -2.818 |
| 367. | Granisetron      | -5.880 | 780. | Diphenamil methylsulfate | -2.813 |
| 368. | Primidone        | -5.879 | 781. | Pheniramine              | -2.796 |
| 369. | Cycloserine      | -5.871 | 782. | Benztropine              | -2.754 |
| 370. | Sotalol          | -5.852 | 783. | Proparacaine             | -2.736 |
| 371. | Estradiol        | -5.829 | 784. | Xylazine                 | -2.698 |
| 372. | Methscopolamine  | -5.828 | 785. | DicycloMine              | -2.668 |
| 373. | Neostigmine      | -5.803 | 786. | Diphenylpyraline         | -2.655 |
| 374. | Pyrimethamine    | -5.797 | 787. | Trifluoperazine          | -2.655 |
| 375. | Rosiglitazone    | -5.789 | 788. | Chlorprothixene          | -2.638 |
| 376. | Ketanserin       | -5.784 | 789. | Duloxetine               | -2.631 |
| 377. | Nitazoxanide     | -5.782 | 790. | Betamethasone            | -2.570 |
| 378. | Tretinoin        | -5.779 | 791. | Mecizine                 | -2.556 |
| 379. | Dapagliflozin    | -5.778 | 792. | Terbinafine              | -2.548 |
| 380. | Flumethasone     | -5.774 | 793. | Amitriptyline            | -2.531 |
| 381. | Meglumine        | -5.769 | 794. | Amantadine               | -2.523 |
| 382. | Fasudil          | -5.767 | 795. | Proadifen                | -2.523 |
| 383. | Alprostadil      | -5.761 | 796. | Pergolide                | -2.505 |
| 384. | Nicorandil       | -5.761 | 797. | Pramoxine                | -2.496 |
| 385. | Amprolium        | -5.750 | 798. | Vorinostat               | -2.484 |
| 386. | Budesonide       | -5.748 | 799. | Propafenone              | -2.453 |
| 387. | (-)-Huperzine A  | -5.747 | 800. | Tetracaine               | -2.403 |
| 388. | S-(+)-Rolipram   | -5.742 | 801. | Mepenzolate romide       | -2.396 |
| 389. | Sorbitol         | -5.735 | 802. | Allylthiourea            | -2.392 |
| 390. | Griseofulvin     | -5.722 | 803. | Vitamin D3               | -2.374 |
| 391. | Resminostat      | -5.721 | 804. | Megestrol                | -2.365 |
| 392. | Didanosine       | -5.713 | 805. | Oxethazaine              | -2.361 |

|      |                    |        |      |                             |        |
|------|--------------------|--------|------|-----------------------------|--------|
| 393. | Scopolamine        | -5.713 | 806. | Benzydamine                 | -2.336 |
| 394. | Ethoxzolamide      | -5.710 | 807. | Hexamethonium               | -2.240 |
| 395. | Pimobendan         | -5.710 | 808. | Tolnaftate                  | -2.236 |
| 396. | Methylprednisolone | -5.705 | 809. | Tolterodine                 | -2.223 |
| 397. | Metronidazole      | -5.701 | 810. | Succinylcholine             | -2.220 |
| 398. | Malotilate         | -5.701 | 811. | Loteprednol etabonate       | -2.196 |
| 399. | Sulfamerazine      | -5.700 | 812. | Bromhexine                  | -2.042 |
| 400. | Fluocinolone       | -5.695 | 813. | Terbinafine                 | -1.989 |
| 401. | Fenspiride         | -5.692 | 814. | Clofazimine                 | -1.985 |
| 402. | Ascorbic acid      | -5.686 | 815. | Ethynodiol                  | -1.937 |
| 403. | Carbachol          | -5.681 | 816. | Arecoline                   | -1.852 |
| 404. | Rofecoxib          | -5.678 | 817. | Nizatidine                  | -1.732 |
| 405. | Bimatoprost        | -5.676 | 818. | Bephenium hydroxynaphthoate | -1.696 |
| 406. | Cortisone acetate  | -5.672 | 819. | Clemastine                  | -1.679 |
| 407. | Toltrazuril        | -5.665 | 820. | Domiphen                    | -1.607 |
| 408. | Ramipril           | -5.660 | 821. | Ranitidine                  | -1.601 |
| 409. | Clorprenaline      | -5.660 | 822. | Calcifediol                 | -1.521 |
| 410. | Chloramphenicol    | -5.655 | 823. | Cetylpyridinium             | -1.443 |
| 411. | Triclabendazole    | -5.645 | 824. | Ethambutol                  | -0.810 |
| 412. | Artemisinin        | -5.642 | 825. | Alverine                    | -0.158 |
| 413. | Lamotrigine        | -5.630 |      |                             |        |

**Table S2.** Standard precision (SP) docking parameters of drugs shortlisted on the basis of HTVS score ( $\leq -7.0$  kcal mol<sup>-1</sup>).

| S. No. | Name of drug   | Docking score (kcal mol <sup>-1</sup> ) | Glide g-score (kcal mol <sup>-1</sup> ) | Glide e-model (kcal mol <sup>-1</sup> ) |
|--------|----------------|-----------------------------------------|-----------------------------------------|-----------------------------------------|
| 1.     | Foscarnet      | -9.123                                  | -9.129                                  | -108.829                                |
| 2.     | Raltitrexed    | -9.043                                  | -9.107                                  | -140.610                                |
| 3.     | Etidronate     | -8.999                                  | -9.245                                  | -138.567                                |
| 4.     | Risedronate    | -8.917                                  | -9.105                                  | -135.810                                |
| 5.     | Fludarabine    | -8.751                                  | -8.843                                  | -129.947                                |
| 6.     | Epalrestat     | -8.622                                  | -8.622                                  | -93.373                                 |
| 7.     | Pamidronate    | -8.614                                  | -8.724                                  | -117.857                                |
| 8.     | Ethamsylate    | -8.555                                  | -8.556                                  | -78.285                                 |
| 9.     | Gimeracil      | -8.367                                  | -8.367                                  | -69.806                                 |
| 10.    | Ticarcillin    | -8.352                                  | -8.352                                  | -105.343                                |
| 11.    | Carbenicillin  | -8.273                                  | -8.273                                  | -104.280                                |
| 12.    | Alendronate    | -8.271                                  | -8.470                                  | -123.768                                |
| 13.    | Pasiniazid     | -8.240                                  | -8.241                                  | - 77.361                                |
| 14.    | Procodazole    | -8.225                                  | -8.266                                  | - 87.745                                |
| 15.    | Zalcitabine    | -8.215                                  | -8.215                                  | - 73.739                                |
| 16.    | Mizoribine     | -8.207                                  | -8.220                                  | - 90.982                                |
| 17.    | Nalidixic acid | -8.205                                  | -8.250                                  | - 84.175                                |
| 18.    | Carboplatin    | -8.192                                  | -9.216                                  | -110.918                                |
| 19.    | Methotrexate   | -8.132                                  | -8.197                                  | -116.799                                |

|     |                       |        |        |          |
|-----|-----------------------|--------|--------|----------|
| 20. | Sodium butyrate       | -8.125 | -8.128 | -70.709  |
| 21. | Ibandronate           | -8.083 | -8.174 | -122.715 |
| 22. | Tenofovir             | -8.040 | -8.622 | -121.062 |
| 23. | Acipimox              | -8.023 | -8.027 | -72.998  |
| 24. | Fosbretabulin         | -7.996 | -8.060 | -112.705 |
| 25. | Biotin                | -7.989 | -7.993 | -89.587  |
| 26. | Aspirin               | -7.972 | -7.972 | -81.327  |
| 27. | Niacin                | -7.940 | -7.949 | -72.803  |
| 28. | Phthalylsulfacetamide | -7.925 | -7.937 | -106.29  |
| 29. | Pircetam              | -7.895 | -7.895 | -57.812  |
| 30. | Tasisulam             | -7.864 | -7.865 | -91.296  |
| 31. | Zileuton              | -7.855 | -7.873 | -62.328  |
| 32. | Cytarabine            | -7.831 | -7.831 | -73.499  |
| 33. | Sulbactam             | -7.829 | -7.829 | -75.507  |
| 34. | Furosemide            | -7.827 | -7.827 | -90.415  |
| 35. | Pidotimod             | -7.806 | -7.806 | -90.853  |
| 36. | Rebamipide            | -7.782 | -7.782 | -94.894  |
| 37. | Isosorbide            | -7.768 | -7.768 | -54.515  |
| 38. | Benzoic acid          | -7.767 | -7.768 | -71.404  |
| 39. | Flumequine            | -7.762 | -7.835 | -87.148  |
| 40. | Mesna                 | -7.749 | -7.751 | -71.850  |
| 41. | Dimesna               | -7.691 | -7.691 | -89.041  |
| 42. | Triflusal             | -7.685 | -7.685 | -79.680  |
| 43. | Nateglinide           | -7.683 | -7.683 | -94.275  |
| 44. | Tranilast             | -7.680 | -7.680 | -90.622  |
| 45. | Cinoxacin             | -7.670 | -7.697 | -81.509  |
| 46. | Cidofovir             | -7.664 | -8.217 | -116.596 |
| 47. | Zaltoprofen           | -7.655 | -7.656 | -83.932  |
| 48. | Flucytosine           | -7.642 | -7.642 | -50.160  |
| 49. | Sodium ascorbate      | -7.613 | -7.613 | -59.354  |
| 50. | Tranexamic acid       | -7.602 | -7.602 | -67.713  |
| 51. | Oxiracetam            | -7.595 | -7.595 | -57.234  |
| 52. | Entecavir             | -7.585 | -7.585 | -65.147  |
| 53. | Valganciclovir        | -7.565 | -7.779 | -91.223  |
| 54. | Cinchophen            | -7.559 | -7.560 | -85.270  |
| 55. | Orotic acid           | -7.556 | -7.556 | -67.307  |
| 56. | Captopril             | -7.543 | -7.543 | -76.978  |
| 57. | Sodium picosulfate    | -7.540 | -7.552 | -86.858  |
| 58. | Olsalazine            | -7.520 | -7.520 | -83.943  |
| 59. | Olopatadine           | -7.508 | -7.508 | -88.016  |
| 60. | Chromocarb            | -7.503 | -7.503 | -68.118  |
| 61. | Sodium gluconate      | -7.469 | -7.469 | -82.280  |
| 62. | Taurine               | -7.467 | -7.468 | -52.865  |
| 63. | Dyphylline            | -7.460 | -7.460 | -65.603  |
| 64. | Indomethacin          | -7.456 | -7.457 | -84.428  |
| 65. | Felbamate             | -7.452 | -7.452 | -68.384  |

|      |                          |        |        |         |
|------|--------------------------|--------|--------|---------|
| 66.  | Sulindac                 | -7.444 | -7.444 | -77.570 |
| 67.  | Ketoprofen               | -7.437 | -7.438 | -80.552 |
| 68.  | Piromidic acid           | -7.428 | -7.458 | -83.963 |
| 69.  | Ciclopirox               | -7.383 | -7.383 | -70.967 |
| 70.  | Meropenem                | -7.378 | -7.407 | -86.425 |
| 71.  | Aicar                    | -7.362 | -7.362 | -60.074 |
| 72.  | Etodolac                 | -7.352 | -7.353 | -77.318 |
| 73.  | Tolmetin                 | -7.337 | -7.338 | -74.503 |
| 74.  | Inosine                  | -7.279 | -7.279 | -61.930 |
| 75.  | Isoniazid                | -7.265 | -7.266 | -48.708 |
| 76.  | Adenosine                | -7.251 | -7.251 | -62.475 |
| 77.  | Suprofen                 | -7.244 | -7.244 | -78.898 |
| 78.  | Ribavirin                | -7.238 | -7.238 | -59.295 |
| 79.  | Oxfendazole              | -7.234 | -7.434 | -71.321 |
| 80.  | Uridine                  | -7.177 | -7.179 | -59.163 |
| 81.  | Enalaprilat              | -7.156 | -7.282 | -75.969 |
| 82.  | Glafenine                | -7.151 | -7.732 | -75.676 |
| 83.  | Clinofbrate              | -7.134 | -7.134 | -96.866 |
| 84.  | Erdosteine               | -7.130 | -7.130 | -76.878 |
| 85.  | Oxaprozin                | -7.128 | -7.129 | -83.109 |
| 86.  | Lonidamine               | -7.122 | -7.122 | -83.615 |
| 87.  | Streptozocin             | -7.109 | -7.109 | -59.470 |
| 88.  | Doxifluridine            | -7.103 | -7.140 | -62.158 |
| 89.  | Pefloxacin mesylate      | -7.087 | -7.248 | -81.811 |
| 90.  | Clofibric acid           | -7.068 | -7.068 | -73.156 |
| 91.  | Enoxacin                 | -7.065 | -7.112 | -79.847 |
| 92.  | Flufenamic acid          | -7.058 | -7.059 | -77.335 |
| 93.  | Mefenamic acid           | -7.047 | -7.048 | -78.325 |
| 94.  | Naproxen                 | -7.029 | -7.030 | -72.750 |
| 95.  | Ibuprofen                | -7.004 | -7.005 | -72.774 |
| 96.  | Diclofenac               | -6.996 | -6.997 | -80.302 |
| 97.  | Niflumic acid            | -6.966 | -6.996 | -77.842 |
| 98.  | Bindarit                 | -6.937 | -6.937 | -85.039 |
| 99.  | Sodium phenylbutyrate    | -6.901 | -6.903 | -69.181 |
| 100. | Sarafloxacin             | -6.876 | -6.947 | -86.362 |
| 101. | Flunixin meglumine       | -6.875 | -6.905 | -75.318 |
| 102. | Dopamine                 | -6.838 | -6.838 | -45.573 |
| 103. | Febuxostat               | -6.753 | -6.754 | -80.477 |
| 104. | Ciprofibrate             | -6.695 | -6.695 | -74.465 |
| 105. | (R)-Baclofen             | -6.685 | -6.685 | -61.289 |
| 106. | L-Carnitine              | -6.684 | -6.684 | -60.776 |
| 107. | Nitrofurazone            | -6.672 | -6.672 | -48.876 |
| 108. | Noradrenaline bitartrate | -6.426 | -6.444 | -48.671 |
| 109. | Methyldopa               | -6.421 | -6.421 | -56.030 |
| 110. | Enrofloxacin             | -6.337 | -6.538 | -70.118 |
| 111. | Lisinopril               | -6.336 | -6.458 | -88.749 |

|      |                    |        |        |         |
|------|--------------------|--------|--------|---------|
| 112. | Omeprazole         | -6.278 | -6.372 | -62.997 |
| 113. | DL-Carnitine       | -6.247 | -6.247 | -57.517 |
| 114. | Dihydroartemisinin | -6.244 | -6.244 | -43.018 |
| 115. | Flopropione        | -5.918 | -6.354 | -57.484 |
| 116. | Diclazuril         | -5.888 | -6.285 | -72.389 |
| 117. | Tolcapone          | -5.831 | -5.886 | -61.033 |
| 118. | Chloroxine         | -5.536 | -5.670 | -48.103 |
| 119. | Chlorothiazide     | -4.789 | -5.103 | -56.436 |
